# Supplementary material for: Effect of Sn valence state in the in situ growth of FeOOH precursor on the performance of the α-Fe2O3 photoanode
Source: Royal Society of Chemistry journal article supplement (doi:10.1039/d3tc04546c), 2024-01-01
Supplement: d3tc04546c1.pdf [file d3tc04546c1.pdf]

## Supporting Information

### Effect of Sn Valence State in situ-growth of FeOOH Precursor on Performance of $\alpha$ -Fe<sub>2</sub>O<sub>3</sub> Photoanode

Weiwei Xia<sup>a\*</sup>, Zichun Chai<sup>†a</sup>, Rui Zhang<sup>a</sup>, Junhui He<sup>a</sup>, Xianghua Zeng<sup>a,b\*</sup>

<sup>a</sup> College of Physics Science and Technology & Institute of Optoelectronic Technology, Yangzhou University, Yangzhou 225002, P.R. China

<sup>b</sup> College of Electrical, Energy and Power Engineering, Yangzhou University, Yangzhou 225127, P. R. China

## Supporting Information

### ■ Results and discussion

**Figure S1.** Tauc's plots of the synthesized Fe<sub>2</sub>O<sub>3</sub>, Sn<sup>2+</sup>-Fe<sub>2</sub>O<sub>3</sub> and Sn<sup>4+</sup>-Fe<sub>2</sub>O<sub>3</sub> films.

Table S1. Relative percentage of Sn for Fe<sub>2</sub>O<sub>3</sub>, Sn<sup>2+</sup>-Fe<sub>2</sub>O<sub>3</sub> and Sn<sup>4+</sup>-Fe<sub>2</sub>O<sub>3</sub> films.

| Samples                                          | Fe    | O     | Sn    |
|--------------------------------------------------|-------|-------|-------|
|                                                  | At%   | At%   | At%   |
| Fe <sub>2</sub> O <sub>3</sub>                   | 24.07 | 75.93 | *     |
| Sn <sup>2+</sup> -Fe <sub>2</sub> O <sub>3</sub> | 20.82 | 68.74 | 10.44 |
| Sn <sup>4+</sup> -Fe <sub>2</sub> O <sub>3</sub> | 21.45 | 77.90 | 0.65  |

Table S2. Relative percentage of O<sub>L</sub> and O<sub>V</sub> components for Fe<sub>2</sub>O<sub>3</sub>, Sn<sup>2+</sup>-Fe<sub>2</sub>O<sub>3</sub> and Sn<sup>4+</sup>-Fe<sub>2</sub>O<sub>3</sub> films.

| Samples                                          | O <sub>L</sub> |       | O <sub>V</sub> |       |
|--------------------------------------------------|----------------|-------|----------------|-------|
|                                                  | BE             | At%   | BE             | At%   |
| Fe <sub>2</sub> O <sub>3</sub>                   | 529.63         | 51.50 | 531.44         | 48.50 |
| Sn <sup>2+</sup> -Fe <sub>2</sub> O <sub>3</sub> | 529.93         | 60.98 | 531.51         | 39.02 |

\* Corresponding authors. Email: [wwxia@yzu.edu.cn](mailto:wwxia@yzu.edu.cn); [xhzeng@yzu.edu.cn](mailto:xhzeng@yzu.edu.cn)

|                                        |        |       |        |       |
|----------------------------------------|--------|-------|--------|-------|
| $\text{Sn}^{4+}\text{-Fe}_2\text{O}_3$ | 529.47 | 43.35 | 531.38 | 56.65 |
|----------------------------------------|--------|-------|--------|-------|

Table S3. Comparison of PEC performance and morphology for different hematite reported previously.

| Material/<br>Reference                                      | Electrolyte | IPCE (%)                               | Photocurrent<br>density( $\text{mA}/\text{cm}^2$ ) | Annealing<br>temperature/Time                                                    |
|-------------------------------------------------------------|-------------|----------------------------------------|----------------------------------------------------|----------------------------------------------------------------------------------|
| $\text{Sn-Fe}_2\text{O}_3$<br>nanostructures <sup>[1]</sup> | 1M NaOH     | 23.7 ( $1.4V_{\text{RHE}}$ )           | 1.63 ( $1.4V_{\text{RHE}}$ )                       | $800^\circ\text{C}/10\text{min}$                                                 |
| E-I- $\text{Sn-Fe}_2\text{O}_3$<br>NWs <sup>[2]</sup>       | 1M KOH      | 27 ( $0.23V_{\text{Ag}/\text{AgCl}}$ ) | 1.36 ( $0.23V_{\text{Ag}/\text{AgCl}}$ )           | $800^\circ\text{C}/20\text{min}$ (HF<br>Etching $\text{SiO}_2$<br>encapsulation) |
| $\text{Sn-Fe}_2\text{O}_3$<br>nanocorals <sup>[3]</sup>     | 1M NaOH     | 19.8 ( $1.23V_{\text{RHE}}$ )          | 1.86 ( $1.23V_{\text{RHE}}$ )                      | $800^\circ\text{C}/20\text{min}$                                                 |
| $\text{Sn-Fe}_2\text{O}_3$ <sup>[4]</sup>                   | 1M NaOH     | 17 ( $1.23V_{\text{RHE}}$ )            | 0.86 ( $1.23V_{\text{RHE}}$ )                      | $800^\circ\text{C}/20\text{min}$                                                 |
| $\text{Sn-Fe}_2\text{O}_3$<br>nanorod <sup>[5]</sup>        | 1M NaOH     |                                        | 1.35 ( $1.23V_{\text{RHE}}$ )                      | $800^\circ\text{C}/10\text{min}$                                                 |
| $\text{Sn-Fe}_2\text{O}_3$<br>nanorod <sup>[6]</sup>        | 1M NaOH     |                                        | 1.00 ( $1.23V_{\text{RHE}}$ )                      | $800^\circ\text{C}/10\text{min}$                                                 |
| $\text{Sn-Fe}_2\text{O}_3$<br>nanorod <sup>[7]</sup>        | 1M KOH      | 22 ( $1.23V_{\text{RHE}}$ )            | 0.93 ( $1.23V_{\text{RHE}}$ )                      | $800^\circ\text{C}/3\text{min}$                                                  |
| $\text{Sn-Fe}_2\text{O}_3$<br>nanotubes <sup>[8]</sup>      | 1M NaOH     |                                        | 0.65 ( $1.23V_{\text{RHE}}$ )                      | $750^\circ\text{C}/30\text{min}$                                                 |
| $\text{Sn-Fe}_2\text{O}_3$ <sup>[9]</sup>                   | 1M NaOH     |                                        | 0.96 ( $1.23V_{\text{RHE}}$ )                      | $750^\circ\text{C}/15\text{min}$                                                 |
| $\text{Sn}(8\%)\text{-Fe}_2\text{O}_3$ <sup>[10]</sup>      | 1M KOH      | 9.9 ( $1.6V_{\text{RHE}}$ )            | 0.298 ( $1.6V_{\text{RHE}}$ )                      | $600^\circ\text{C}/240\text{min}$                                                |

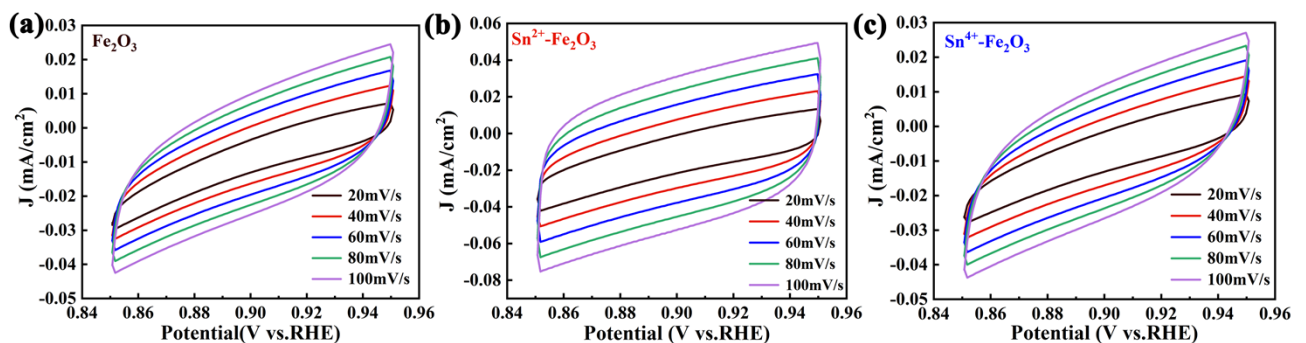

Figure S2. Cyclic voltammetry (CV) for  $\text{Fe}_2\text{O}_3$ ,  $\text{Sn}^{2+}\text{-Fe}_2\text{O}_3$  and  $\text{Sn}^{4+}\text{-Fe}_2\text{O}_3$  photoanodes at various scan rates.

Figure S3. EIS Nyquist for  $\text{Fe}_2\text{O}_3$ ,  $\text{Sn}^{2+}\text{-Fe}_2\text{O}_3$  and  $\text{Sn}^{4+}\text{-Fe}_2\text{O}_3$  photoanodes.

## Reference

- [1] A. Annamalai, P.S. Shinde, T.H. Jeon, H.H. Lee, H.G. Kim, W. Choi, J.S. Jang, Fabrication of superior  $\alpha$ -Fe<sub>2</sub>O<sub>3</sub> nanorod photoanodes through ex-situ Sn-doping for solar water splitting, *Solar Energy Materials and Solar Cells*, 144 (2016) 247-255.
- [2] M. Li, Y. Yang, Y. Ling, W. Qiu, F. Wang, T. Liu, Y. Song, X. Liu, P. Fang, Y. Tong, Y. Li, Morphology and Doping Engineering of Sn-Doped Hematite Nanowire Photoanodes, *Nano Letters*, 17 (2017) 2490-2495.
- [3] Y. Ling, G. Wang, D.A. Wheeler, J.Z. Zhang, Y. Li, Sn-Doped Hematite Nanostructures for Photoelectrochemical Water Splitting, *Nano Letters*, 11 (2011) 2119-2125.
- [4] A.G. Tamirat, W.-N. Su, A.A. Dubale, H.-M. Chen, B.-J. Hwang, Photoelectrochemical water splitting at low applied potential using a NiOOH coated codoped (Sn, Zr)  $\alpha$ -Fe<sub>2</sub>O<sub>3</sub> photoanode, *J. Mater. Chem. A*, 3 (2015) 5949-5961.
- [5] H. Ma, M.A. Mahadik, J.W. Park, M. Kumar, H.S. Chung, W.S. Chae, G.W. Kong, H.H. Lee, S.H. Choi, J.S. Jang, Highly self-diffused Sn doping in  $\alpha$ -Fe<sub>2</sub>O<sub>3</sub> nanorod photoanodes initiated from  $\beta$ -FeOOH nanorod/FTO by hydrogen treatment for solar water oxidation, *Nanoscale*, 10 (2018) 22560-22571.
- [6] A. Annamalai, H.H. Lee, S.H. Choi, S.Y. Lee, E. Gracia-Espino, A. Subramanian, J. Park, K.-j. Kong, J.S. Jang, Sn/Be Sequentially co-doped Hematite Photoanodes for Enhanced Photoelectrochemical Water Oxidation: Effect of Be<sup>2+</sup> as co-dopant, *Scientific Reports*, 6 (2016).
- [7] J. Wang, C. Du, Q. Peng, J. Yang, Y. Wen, B. Shan, R. Chen, Enhanced photoelectrochemical water splitting performance of hematite nanorods by Co and Sn co-doping, *Int. J. Hydrog. Energy*, 42 (2017) 29140-29149.
- [8] S.-F. Duan, Y.-Y. Geng, X.-B. Pan, X.-Q. Yao, Y.-X. Zhao, X. Li, C.-L. Tao, D.-D. Qin, Tubular morphology preservation and doping engineering of Sn/P-codoped hematite for photoelectrochemical water oxidation, *Dalton Transactions*, 48 (2019) 928-935.
- [9] J. Cai, H. Chen, C. Liu, S. Yin, H. Li, L. Xu, H. Liu, Q. Xie, Engineered Sn- and Mg-doped hematite photoanodes for efficient photoelectrochemical water oxidation, *Dalton Transactions*, 49 (2020) 11282-11289.
- [10] T.H. Jeon, H.-i. Cho, H. Park, H.-i. Kim, W. Choi, Synergistic effect of Sn doping and hydrogenation on hematite electrodes for photoelectrochemical water oxidation, *Materials Chemistry Frontiers*, 5 (2021) 6592-6602.
